# Supplementary material
Source: publisher figshare collection journal article supplement (https://brill.figshare.com/articles/dataset/_/23283494)
Supplement: Supplementary file 1 [file 1]

**Confocal laser scanning microscopy and three-dimensional reconstruction delimit species in a taxonomically challenging group: a revision of the plant bug genus *Anapus* Stål, 1858 (Heteroptera: Miridae)**

**Shamil Z. Davletshin<sup>a</sup> and Fedor V. Konstantinov<sup>b,c,\*</sup>**

<sup>a</sup>Department of Entomology, Faculty of Biology, St. Petersburg State University,  
Universitetskaya nab. 7/9, St. Petersburg 199034, Russia

<sup>b</sup>National Museum of Natural History, Bulgarian Academy of Sciences, 1 Tsar Osvoboditel  
Blvd, 1000 Sofia, Bulgaria

<sup>c</sup>Zoological Institute, Russian Academy of Sciences, Universitetskaya nab. 1, St. Petersburg  
199034, Russia

\*Corresponding author; e-mail: fkonstantinov@gmail.com

ORCID iDs: Davletshin: 0000-0002-3087-0029; Konstantinov: 0000-0002-7013-5686

**Supplementary Material**

**Video S1.** Three-dimensional reconstruction of aedeagus of *Anapus dorsalis*.

**Video S2.** Three-dimensional reconstruction of aedeagus of *Anapus freyi*.

**Video S3.** Three-dimensional reconstruction of aedeagus of *Anapus kirschbaumi*.

**Video S4.** Three-dimensional reconstruction of aedeagus of *Anapus pachymerus*.

**Video S5.** Three-dimensional reconstruction of aedeagus of *Anapus rugicollis*.
